# Supplementary material for: Health-Related Quality of Life (HRQoL) Outcomes Following Injury in Childhood and Adolescence Using EuroQol (EQ-5D) Responses with Pooled Longitudinal Data
Source: MDPI journal article supplement (doi:10.3390/ijerph181910156), 2021-09-27
Supplement: s1 [file s1]

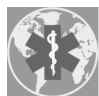

SUPPLEMENTARY MATERIAL

**Supplementary Table S1.** EQ-5D-3L Health State Questions and Response Options.

| EQ-5D-3L                                                                            |
|-------------------------------------------------------------------------------------|
| <b>Mobility (walking about)</b>                                                     |
| I have no problems walking about                                                    |
| I have some problems walking about                                                  |
| I am confined to bed                                                                |
| <b>Self-care</b>                                                                    |
| I have no problems with self-care                                                   |
| I have some problems washing or dressing myself                                     |
| I am unable to wash or dress myself                                                 |
| <b>Usual activities (e.g. work, study, housework, family or leisure activities)</b> |
| I have no problems with performing my usual activities                              |
| I have some problems with performing my usual activities                            |
| I am unable to perform my usual activities                                          |
| <b>Pain/discomfort</b>                                                              |
| I have no pain or discomfort                                                        |
| I have moderate pain or discomfort                                                  |
| I have extreme pain or discomfort                                                   |
| <b>Anxiety/depression</b>                                                           |
| I am not anxious or depressed                                                       |
| I am moderately anxious or depressed                                                |
| I am extremely anxious or depressed                                                 |

**Supplementary Table S2.** Mean and Standard Deviation (SD) of EQ-5D Utility Score and Frequency and Percentages of EQ-5D Health States Over Time.

| Measure                               | Baseline      | 1 month       | 4 months      | 6 months      | 12 months     | 24 months     |
|---------------------------------------|---------------|---------------|---------------|---------------|---------------|---------------|
| <b>EQ-5D Utility Score</b>            | <b>N=1071</b> | <b>n=344</b>  | <b>n=784</b>  | <b>n=1309</b> | <b>n=2000</b> | <b>n=1362</b> |
| Mean (SD)                             | 0.947 (0.091) | 0.818 (0.222) | 0.896 (0.134) | 0.858 (0.187) | 0.887 (0.159) | 0.884 (0.151) |
| <b>EQ-5D - Mobility</b>               | <b>n=427</b>  | <b>n=351</b>  |               | <b>n=1127</b> | <b>n=1083</b> | <b>n=533</b>  |
| Problems                              | 9 (2.1%)      | 68 (19.4%)    |               | 142 (12.6%)   | 125 (11.5%)   | 66 (12.4%)    |
| No Problems                           | 418 (97.9%)   | 283 (80.6%)   |               | 985 (87.4%)   | 958 (88.5%)   | 467 (87.6%)   |
| <b>EQ-5D – Self-Care</b>              | <b>n=429</b>  | <b>n=353</b>  |               | <b>n=1116</b> | <b>n=1070</b> | <b>n=533</b>  |
| Problems                              | 8 (1.9%)      | 85 (24.1%)    |               | 64 (5.7%)     | 54 (5.0%)     | 29 (5.4%)     |
| No Problems                           | 421 (98.1%)   | 268 (75.9%)   |               | 1052 (94.3%)  | 1016 (95.0%)  | 504 (94.6%)   |
| <b>EQ-5D - Activity</b>               | <b>n=430</b>  | <b>n=352</b>  |               | <b>n=1107</b> | <b>n=1061</b> | <b>n=533</b>  |
| Problems                              | 17 (4.0%)     | 164 (46.6%)   |               | 323 (29.2%)   | 243 (22.9%)   | 144 (27.0%)   |
| No Problems                           | 413 (96.0%)   | 188 (53.4%)   |               | 784 (70.8%)   | 818 (77.1%)   | 389 (73.0%)   |
| <b>EQ-5D - Pain</b>                   | <b>n=428</b>  | <b>n=359</b>  |               | <b>n=1095</b> | <b>n=1051</b> | <b>n=526</b>  |
| Problems                              | 25 (5.8%)     | 139 (38.7%)   |               | 297 (27.1%)   | 245 (23.3%)   | 144 (27.4%)   |
| No Problems                           | 403 (94.2%)   | 220 (61.3%)   |               | 798 (72.9%)   | 806 (76.7%)   | 382 (72.6%)   |
| <b>EQ-5D – Anxiety and Depression</b> | <b>n=427</b>  | <b>n=357</b>  |               | <b>n=1128</b> | <b>n=1080</b> | <b>n=529</b>  |
| Problems                              | 19 (4.5%)     | 63 (17.6%)    |               | 206 (18.3%)   | 179 (16.6%)   | 142 (26.8%)   |
| No Problems                           | 408 (95.5%)   | 294 (82.4%)   |               | 922 (81.7%)   | 901 (83.4%)   | 387 (73.2%)   |

Supplementary Table S3. EQ-5D Utility Score and Five Health States Model Results.

|                                        | EQ-5D<br>Utility<br>Score<br>UCoeff<br>(CI) | EQ-5D<br>Utility<br>Score<br>ACoef.<br>(CI) | Mobility<br>URR<br>(CI)    | Mobility<br>ARR<br>(CI)    | Self-<br>Care<br>URR<br>(CI) | Self-<br>Care<br>ARR<br>(CI) | Activity<br>URR<br>(CI)    | Activity<br>ARR<br>(CI)    | Pain<br>URR<br>(CI)        | Pain<br>ARR<br>(CI)        | Anxiety<br>& De-<br>pression<br>URR<br>(CI) | Anxiety<br>& De-<br>pression<br>ARR<br>(CI) |
|----------------------------------------|---------------------------------------------|---------------------------------------------|----------------------------|----------------------------|------------------------------|------------------------------|----------------------------|----------------------------|----------------------------|----------------------------|---------------------------------------------|---------------------------------------------|
| <b>Sex</b>                             |                                             |                                             |                            |                            |                              |                              |                            |                            |                            |                            |                                             |                                             |
| Male                                   | Ref                                         |                                             |                            |                            |                              |                              |                            |                            |                            |                            |                                             |                                             |
| Female                                 | <b>-0.03</b><br>(-0.05,-<br>0.02)           | <b>-0.04</b><br>(-0.05,-<br>0.02)           | 0.97<br>(0.93,1.01)        | 0.95~<br>(0.91,1.00)       | 1.01<br>(0.98,1.04)          | 1.00<br>(0.97,1.03)          | 0.93~<br>(0.86,1.00)       | <b>0.87</b><br>(0.81,0.94) | <b>0.86</b><br>(0.80,0.93) | <b>0.82</b><br>(0.76,0.89) | <b>0.90</b><br>(0.85,0.96)                  | <b>0.88</b><br>(0.83,0.94)                  |
| <b>Age Group</b>                       |                                             |                                             |                            |                            |                              |                              |                            |                            |                            |                            |                                             |                                             |
| 5-9 years                              | Ref                                         |                                             |                            |                            |                              |                              |                            |                            |                            |                            |                                             |                                             |
| 10-14 years                            | <b>-0.04</b><br>(-0.06,-<br>0.03)           | <b>-0.03</b><br>(-0.05,-<br>0.02)           | 0.97<br>(0.92,1.02)        | 0.97<br>(0.93,1.02)        | 0.98<br>(0.94,1.03)          | 0.99<br>(0.94,1.03)          | <b>0.92</b><br>(0.85,0.99) | <b>0.90</b><br>(0.83,0.98) | 0.94<br>(0.87,1.02)        | 0.93<br>(0.85,1.02)        | 0.97<br>(0.92,1.01)                         | 0.94<br>(0.89,1.01)                         |
| 15-17 years                            | <b>-0.09</b><br>(-0.1,-<br>0.08)            | <b>-0.06</b><br>(-0.08,-<br>0.05)           | <b>0.87</b><br>(0.83,0.90) | 0.95<br>(0.86,1.04)        | <b>0.93</b><br>(0.91,0.96)   | 0.98<br>(0.92,1.04)          | <b>0.71</b><br>(0.67,0.76) | <b>0.82</b><br>(0.72,0.93) | <b>0.76</b><br>(0.71,0.81) | <b>0.81</b><br>(0.69,0.95) | <b>0.82</b><br>(0.78,0.86)                  | 0.98<br>(0.91,1.06)                         |
| <b>Socio Economic<br/>Status (SES)</b> |                                             |                                             |                            |                            |                              |                              |                            |                            |                            |                            |                                             |                                             |
| Low SES                                | Ref                                         |                                             |                            |                            |                              |                              |                            |                            |                            |                            |                                             |                                             |
| Moderate SES                           | <b>0.03</b><br>(0.01,0.04)                  | 0.02~<br>(0.00,0.03)                        | 1.01<br>(0.97,1.06)        | 1.01<br>(0.97,1.05)        | 1.02<br>(0.99,1.04)          | 1.02<br>(0.99,1.04)          | <b>1.09</b><br>(1.02,1.17) | <b>1.07</b><br>(1.00,1.14) | 1.06<br>(0.99,1.13)        | 1.06<br>(0.99,1.13)        | 1.02<br>(0.97,1.08)                         | 1.00<br>(0.95,1.05)                         |
| High SES                               | <b>0.05</b><br>(0.03,0.07)                  | <b>0.03</b><br>(0.01,0.04)                  | <b>1.05</b><br>(1.00,1.10) | 1.03<br>(0.99,1.08)        | 1.02<br>(0.98,1.05)          | 1.00<br>(0.97,1.04)          | <b>1.10</b><br>(1.02,1.18) | 1.04<br>(0.97,1.11)        | <b>1.16</b><br>(1.08,1.24) | <b>1.12</b><br>(1.04,1.20) | <b>1.09</b><br>(1.03,1.15)                  | 1.03<br>(0.98,1.08)                         |
| <b>Transport Status</b>                |                                             |                                             |                            |                            |                              |                              |                            |                            |                            |                            |                                             |                                             |
| Non-transport                          | Ref                                         |                                             |                            |                            |                              |                              |                            |                            |                            |                            |                                             |                                             |
| Transport                              | <b>-0.07</b><br>(-0.08,-<br>0.05)           | <b>-0.02</b><br>(-0.04,-<br>0.01)           | <b>0.86</b><br>(0.82,0.90) | <b>0.92</b><br>(0.88,0.97) | <b>0.93</b><br>(0.91,0.96)   | 0.97~<br>(0.94,1.00)         | <b>0.76</b><br>(0.71,0.81) | <b>0.91</b><br>(0.84,0.98) | <b>0.78</b><br>(0.73,0.83) | <b>0.91</b><br>(0.84,0.98) | <b>0.84</b><br>(0.79,0.88)                  | 0.95<br>(0.89,1.01)                         |
| <b>Hospital Status</b>                 |                                             |                                             |                            |                            |                              |                              |                            |                            |                            |                            |                                             |                                             |
| ED presentation<br>only                | Ref                                         |                                             |                            |                            |                              |                              |                            |                            |                            |                            |                                             |                                             |
| Hospital admis-<br>sion                | <b>-0.06</b><br>(-0.07,-<br>0.05)           | 0.00<br>(-0.02,0.02)                        | <b>0.85</b><br>(0.82,0.87) | <b>0.93</b><br>(0.88,0.99) | <b>0.89</b><br>(0.87,0.91)   | <b>0.88</b><br>(0.83,0.93)   | <b>0.68</b><br>(0.65,0.71) | <b>0.76</b><br>(0.68,0.84) | <b>0.76</b><br>(0.72,0.80) | <b>0.85</b><br>(0.77,0.95) | <b>0.81</b><br>(0.78,0.84)                  | <b>0.93</b><br>(0.87,0.99)                  |
| <b>Comorbidity Sta-<br/>tus</b>        |                                             |                                             |                            |                            |                              |                              |                            |                            |                            |                            |                                             |                                             |
| No comorbidities                       | Ref                                         |                                             |                            |                            |                              |                              |                            |                            |                            |                            |                                             |                                             |
| At least 1 comor-<br>bidity            | <b>-0.09</b><br>(-0.11,-<br>0.06)           | <b>-0.04</b><br>(-0.06,-<br>0.01)           | <b>0.85</b><br>(0.77,0.94) | 0.99<br>(0.90,1.08)        | <b>0.93</b><br>(0.87,0.99)   | 1.01<br>(0.95,1.07)          | <b>0.78</b><br>(0.68,0.88) | 0.94<br>(0.83,1.06)        | <b>0.88</b><br>(0.78,0.99) | 0.99<br>(0.88,1.12)        | <b>0.78</b><br>(0.69,0.89)                  | 0.99<br>(0.89,1.11)                         |
| <b>ISS Tertiles</b>                    |                                             |                                             |                            |                            |                              |                              |                            |                            |                            |                            |                                             |                                             |
| Low (<5)                               | Ref                                         |                                             |                            |                            |                              |                              |                            |                            |                            |                            |                                             |                                             |
| Mid (5-15)                             | <b>-0.08</b><br>(-0.09,-<br>0.06)           | -0.02~<br>(-0.04,0.00)                      | <b>0.89</b><br>(0.85,0.93) | 0.99<br>(0.93,1.06)        | <b>0.94</b><br>(0.91,0.96)   | 1.00<br>(0.96,1.04)          | <b>0.74</b><br>(0.69,0.80) | 0.98<br>(0.88,1.09)        | <b>0.79</b><br>(0.74,0.85) | 1.04<br>(0.93,1.15)        | <b>0.78</b><br>(0.74,0.83)                  | 0.96<br>(0.88,1.04)                         |
| High (16+)                             | <b>-0.07</b><br>(-0.09,-<br>0.06)           | -0.01<br>(-0.03,0.02)                       | <b>0.85</b><br>(0.8,0.90)  | 0.95<br>(0.87,1.05)        | <b>0.90</b><br>(0.87,0.94)   | 0.98<br>(0.92,1.04)          | <b>0.72</b><br>(0.66,0.78) | 1.04<br>(0.89,1.22)        | <b>0.85</b><br>(0.79,0.91) | 1.11<br>(0.97,1.28)        | <b>0.75</b><br>(0.7,0.81)                   | 0.96<br>(0.84,1.09)                         |

| Intent                                               |                               |                               |                            |                            |                            |                            |                            |                            |                            |                            |                            |                            |
|------------------------------------------------------|-------------------------------|-------------------------------|----------------------------|----------------------------|----------------------------|----------------------------|----------------------------|----------------------------|----------------------------|----------------------------|----------------------------|----------------------------|
| Unintentional                                        | Ref                           |                               |                            |                            |                            |                            |                            |                            |                            |                            |                            |                            |
| Intentional                                          | <b>-0.09</b><br>(-0.13,-0.06) | <b>-0.08</b><br>(-0.11,-0.04) | 0.97<br>(0.9,1.06)         | 0.94<br>(0.86,1.03)        | 1.00<br>(0.95,1.05)        | 0.99<br>(0.92,1.06)        | 0.86~<br>(0.73,1.00)       | 0.86<br>(0.71,1.03)        | 0.90<br>(0.79,1.03)        | <b>0.85</b><br>(0.73,0.98) | <b>0.57</b><br>(0.46,0.71) | <b>0.62</b><br>(0.49,0.78) |
| Intent not known                                     | <b>0.03</b><br>(0.01,0.04)    | <b>0.02</b><br>(-0.01,0.04)   | 1.02<br>(0.98,1.06)        | 1.00<br>(0.94,1.07)        | <b>1.03</b><br>(1.01,1.05) | 0.99<br>(0.96,1.03)        | <b>1.08</b><br>(1.02,1.14) | 1.02<br>(0.92,1.12)        | <b>1.06</b><br>(1.00,1.12) | 1.00<br>(0.91,1.10)        | <b>1.10</b><br>(1.06,1.15) | 1.04<br>(0.96,1.12)        |
| Time                                                 |                               |                               |                            |                            |                            |                            |                            |                            |                            |                            |                            |                            |
| 1-month                                              | Ref                           |                               |                            |                            |                            |                            |                            |                            |                            |                            |                            |                            |
| 3,4-months                                           | <b>0.10</b><br>(0.08,0.12)    | <b>0.12</b><br>(0.09,0.14)    | NA                         |
| 6-months                                             | <b>0.08</b><br>(0.06,0.10)    | <b>0.11</b><br>(0.08,0.13)    | <b>1.08</b><br>(1.03,1.14) | <b>1.17</b><br>(1.11,1.23) | <b>1.24</b><br>(1.17,1.32) | <b>1.31</b><br>(1.22,1.40) | <b>1.33</b><br>(1.2,1.46)  | <b>1.64</b><br>(1.48,1.83) | <b>1.19</b><br>(1.09,1.29) | <b>1.40</b><br>(1.28,1.54) | 0.99<br>(0.94,1.05)        | <b>1.13</b><br>(1.08,1.19) |
| 12-months                                            | <b>0.11</b><br>(0.09,0.13)    | <b>0.13</b><br>(0.1,0.15)     | <b>1.10</b><br>(1.04,1.16) | <b>1.18</b><br>(1.11,1.24) | <b>1.25</b><br>(1.18,1.33) | <b>1.31</b><br>(1.22,1.40) | <b>1.44</b><br>(1.31,1.60) | <b>1.78</b><br>(1.6,1.99)  | <b>1.25</b><br>(1.15,1.36) | <b>1.47</b><br>(1.34,1.61) | 1.01<br>(0.96,1.07)        | <b>1.16</b><br>(1.1,1.22)  |
| 24-months                                            | <b>0.11</b><br>(0.09,0.13)    | <b>0.13</b><br>(0.11,0.15)    | <b>1.09</b><br>(1.02,1.15) | <b>1.21</b><br>(1.14,1.29) | <b>1.25</b><br>(1.17,1.33) | <b>1.33</b><br>(1.24,1.43) | <b>1.37</b><br>(1.22,1.53) | <b>1.85</b><br>(1.65,2.08) | <b>1.19</b><br>(1.07,1.31) | <b>1.48</b><br>(1.34,1.64) | <b>0.89</b><br>(0.83,0.95) | <b>1.10</b><br>(1.02,1.17) |
| Injury Type (any)^                                   |                               |                               |                            |                            |                            |                            |                            |                            |                            |                            |                            |                            |
| N33, N34 Spinal cord lesion                          | <b>-0.16</b><br>(-0.23,-0.09) | <b>-0.11</b><br>(-0.17,-0.04) | <b>0.62</b><br>(0.45,0.85) | <b>0.61</b><br>(0.45,0.83) | <b>0.74</b><br>(0.60,0.90) | <b>0.76</b><br>(0.63,0.91) | <b>0.56</b><br>(0.40,0.78) | <b>0.64</b><br>(0.47,0.88) | 0.85<br>(0.68,1.06)        | 0.98<br>(0.77,1.26)        | 0.96<br>(0.84,1.11)        | 1.03<br>(0.88,1.20)        |
| N19, N26 Fracture of femur                           | <b>-0.11</b><br>(-0.14,-0.08) | <b>-0.07</b><br>(-0.10,-0.04) | <b>0.68</b><br>(0.59,0.79) | <b>0.71</b><br>(0.62,0.82) | <b>0.83</b><br>(0.77,0.90) | <b>0.85</b><br>(0.78,0.92) | <b>0.64</b><br>(0.54,0.76) | <b>0.71</b><br>(0.60,0.84) | <b>0.76</b><br>(0.64,0.89) | <b>0.79</b><br>(0.67,0.94) | <b>0.87</b><br>(0.77,0.98) | 0.95<br>(0.83,1.07)        |
| N20 Fracture of patella, tibia, fibula, or ankle     | <b>-0.05</b><br>(-0.08,-0.03) | <b>-0.06</b><br>(-0.08,-0.04) | <b>0.79</b><br>(0.74,0.85) | <b>0.77</b><br>(0.72,0.83) | <b>0.96</b><br>(0.93,0.99) | <b>0.93</b><br>(0.89,0.96) | <b>0.83</b><br>(0.76,0.91) | <b>0.76</b><br>(0.70,0.84) | <b>0.82</b><br>(0.75,0.89) | <b>0.78</b><br>(0.71,0.85) | 0.98<br>(0.92,1.04)        | 0.93~<br>(0.87,1.00)       |
| N28 Moderate to severe traumatic brain injury        | <b>-0.04</b><br>(-0.05,-0.02) | -0.02~<br>(-0.04,0.00)        | 0.94<br>(0.88,1.01)        | 0.95<br>(0.87,1.03)        | 0.95~<br>(0.9,1.00)        | 0.94<br>(0.88,1.01)        | <b>0.75</b><br>(0.66,0.85) | <b>0.83</b><br>(0.71,0.96) | <b>0.89</b><br>(0.81,0.98) | 0.96<br>(0.84,1.10)        | <b>0.77</b><br>(0.70,0.86) | 0.89<br>(0.78,1.01)        |
| N37, N17, N18 Crush injury, fracture foot/hand bones | -0.03<br>(-0.06,0.00)         | <b>-0.01</b><br>(-0.03,0.02)  | 0.92~<br>(0.85,1.00)       | 0.93<br>(0.87,1.01)        | 0.96<br>(0.91,1.01)        | 0.95~<br>(0.91,1.00)       | 0.93<br>(0.83,1.04)        | 0.93<br>(0.84,1.03)        | 0.89~<br>(0.79,1.00)       | 0.91<br>(0.81,1.02)        | 0.98<br>(0.91,1.07)        | 0.99<br>(0.92,1.06)        |
| N43 Internal hemorrhage in abdomen or pelvis         | -0.02~<br>(-0.04,0.00)        | 0.01<br>(-0.02,0.03)          | <b>0.92</b><br>(0.85,0.99) | 0.98<br>(0.9,1.06)         | 0.97<br>(0.93,1.01)        | 1.01<br>(0.96,1.06)        | 0.90~<br>(0.82,1.00)       | 1.04<br>(0.92,1.18)        | 0.96<br>(0.87,1.05)        | 1.04<br>(0.92,1.17)        | <b>0.90</b><br>(0.82,0.98) | 0.99<br>(0.89,1.10)        |
| N27 Minor TBI                                        | -0.01<br>(-0.02,0.01)         | 0.00<br>(-0.01,0.02)          | 0.99<br>(0.94,1.04)        | 1.05<br>(0.99,1.12)        | 1.00<br>(0.97,1.04)        | <b>1.05</b><br>(1.00,1.09) | <b>0.88</b><br>(0.80,0.97) | 1.04<br>(0.94,1.15)        | <b>0.91</b><br>(0.83,0.99) | 1.00<br>(0.90,1.10)        | <b>0.90</b><br>(0.84,0.97) | 1.07<br>(0.98,1.16)        |

|                                                              |                      |                      |                    |                    |                    |                    |                    |                    |                    |                    |                    |                    |
|--------------------------------------------------------------|----------------------|----------------------|--------------------|--------------------|--------------------|--------------------|--------------------|--------------------|--------------------|--------------------|--------------------|--------------------|
| N21 Fracture of pelvis                                       | <b>-0.11</b>         | <b>-0.05</b>         | <b>0.77</b>        | <b>0.84</b>        | <b>0.92</b>        | 0.96               | <b>0.63</b>        | <b>0.80</b>        | <b>0.65</b>        | <b>0.78</b>        | <b>0.70</b>        | <b>0.84</b>        |
|                                                              | <b>(-0.15,-0.08)</b> | <b>(-0.08,-0.02)</b> | <b>(0.68,0.88)</b> | <b>(0.74,0.94)</b> | <b>(0.86,0.99)</b> | (0.90,1.03)        | <b>(0.52,0.77)</b> | <b>(0.67,0.95)</b> | <b>(0.54,0.79)</b> | <b>(0.65,0.94)</b> | <b>(0.59,0.82)</b> | <b>(0.72,0.98)</b> |
| N42 Severe chest Injury                                      | <b>-0.06</b>         | 0.01                 | <b>0.90</b>        | 1.03               | <b>0.94</b>        | 1.02               | <b>0.78</b>        | 1.01               | <b>0.84</b>        | 1.03               | <b>0.82</b>        | 1.02               |
|                                                              | <b>(-0.08,-0.04)</b> | (-0.01,0.03)         | <b>(0.84,0.97)</b> | (0.96,1.10)        | <b>(0.90,0.98)</b> | (0.97,1.07)        | <b>(0.69,0.87)</b> | (0.90,1.14)        | <b>(0.76,0.93)</b> | (0.93,1.15)        | <b>(0.75,0.90)</b> | (0.92,1.13)        |
| N8, N9, N10 Burns (including lower airways)                  | -0.05                | -0.06                | 0.97               | 0.96               | 0.97               | 0.93               | 0.92               | 0.84               | 1.06               | 1.03               | 0.87               | 0.82               |
|                                                              | (-0.12,0.01)         | (-0.13,0.01)         | (0.84,1.12)        | (0.85,1.09)        | (0.88,1.07)        | (0.84,1.03)        | (0.71,1.19)        | (0.63,1.10)        | (0.88,1.27)        | (0.86,1.24)        | (0.69,1.10)        | (0.63,1.08)        |
| N25 Fracture of vertebral column                             | <b>-0.10</b>         | <b>-0.05</b>         | <b>0.88</b>        | 0.95               | <b>0.90</b>        | <b>0.93</b>        | <b>0.71</b>        | <b>0.79</b>        | <b>0.71</b>        | <b>0.74</b>        | <b>0.84</b>        | <b>0.90</b>        |
|                                                              | <b>(-0.12,-0.07)</b> | <b>(-0.08,-0.03)</b> | <b>(0.83,0.95)</b> | (0.90,1.02)        | <b>(0.86,0.94)</b> | <b>(0.89,0.97)</b> | <b>(0.64,0.80)</b> | <b>(0.70,0.88)</b> | <b>(0.64,0.79)</b> | <b>(0.65,0.83)</b> | <b>(0.78,0.91)</b> | <b>(0.82,0.98)</b> |
| N35, N36 Asphyxiation, Non-fatal submersion                  | <b>-0.04</b>         | <b>-0.12</b>         | 0.97               | 0.83               | 0.98               | 0.78               | 0.92               | 0.96               | 0.94               | 1.24               | 0.97               | <b>0.36</b>        |
|                                                              | <b>(-0.25,-0.1)</b>  | <b>(-0.21,-0.03)</b> | (0.44,1.22)        | (0.57,1.22)        | (0.54,1.21)        | (0.47,1.28)        | (0.63,1.45)        | (0.51,1.83)        | (1.01,1.40)        | (0.98,1.57)        | (0.18,1.07)        | <b>(0.14,0.96)</b> |
| N40, N44 Contusion, open wound                               | <b>-0.06</b>         | -0.02~               | <b>0.89</b>        | <b>0.95</b>        | <b>0.95</b>        | 0.97~              | <b>0.80</b>        | <b>0.92</b>        | <b>0.84</b>        | 0.96               | <b>0.79</b>        | <b>0.89</b>        |
|                                                              | <b>(-0.07,-0.04)</b> | (-0.03,0.00)         | <b>(0.85,0.94)</b> | <b>(0.91,0.99)</b> | <b>(0.92,0.98)</b> | (0.94,1.00)        | <b>(0.74,0.86)</b> | <b>(0.85,0.99)</b> | <b>(0.78,0.90)</b> | (0.89,1.03)        | <b>(0.74,0.85)</b> | <b>(0.83,0.94)</b> |
| N14 Other injuries of muscle & tendon and other dislocations | <b>-0.03</b>         | -0.02~               | <b>0.92</b>        | 0.95~              | 0.97~              | 0.97               | <b>0.91</b>        | <b>0.91</b>        | <b>0.92</b>        | 0.94               | 0.97               | 0.97               |
|                                                              | <b>(-0.05,-0.01)</b> | (-0.04,0.00)         | <b>(0.87,0.98)</b> | (0.90,1.00)        | (0.94,1.00)        | (0.94,1.01)        | <b>(0.84,0.99)</b> | <b>(0.84,0.99)</b> | <b>(0.85,0.99)</b> | (0.87,1.01)        | (0.92,1.03)        | (0.92,1.03)        |
| N15 Fracture of clavicle, scapula, or humerus                | -0.02~               | -0.02~               | 1.01               | 0.99               | 0.98               | 0.97               | 0.92               | <b>0.89</b>        | 0.93               | <b>0.91</b>        | 0.95               | 0.95               |
|                                                              | (-0.05,0.00)         | (-0.04,0.00)         | (0.95,1.06)        | (0.94,1.04)        | (0.94,1.02)        | (0.92,1.01)        | (0.83,1.02)        | <b>(0.81,0.98)</b> | (0.85,1.02)        | <b>(0.83,0.99)</b> | (0.87,1.02)        | (0.88,1.03)        |
| N22 Fracture of radius or ulna                               | 0.02                 | 0.00                 | 1.09               | 0.98               | 0.98               | <b>0.94</b>        | 1.07               | <b>0.91</b>        | 1.11               | 0.96               | 1.09               | 0.99               |
|                                                              | (0.01,0.04)          | (-0.02,0.02)         | (1.05,1.13)        | (0.94,1.02)        | (0.95,1.01)        | <b>(0.91,0.98)</b> | (0.99,1.15)        | <b>(0.84,0.99)</b> | (1.03,1.18)        | (0.89,1.04)        | (1.04,1.15)        | (0.94,1.06)        |
| Other                                                        | <b>-0.05</b>         | -0.01~               | <b>0.94</b>        | 0.99               | <b>0.97</b>        | 0.99               | <b>0.84</b>        | 0.98               | <b>0.85</b>        | 0.93               | <b>0.81</b>        | <b>0.93</b>        |
|                                                              | <b>(-0.06,-0.04)</b> | (-0.03,0.00)         | <b>(0.90,0.98)</b> | (0.95,1.04)        | <b>(0.95,0.99)</b> | (0.96,1.03)        | <b>(0.79,0.89)</b> | (0.92,1.05)        | <b>(0.8,0.90)</b>  | (0.87,1.01)        | <b>(0.77,0.85)</b> | <b>(0.88,0.99)</b> |
| Number of observations                                       | 5,341                |                      | 2,776              |                    | 2,759              |                    | 2,747              |                    | 2,723              |                    | 2,776              |                    |
| Number of groups                                             | 2,135                |                      | 1,131              |                    | 1,133              |                    | 1,131              |                    | 1,134              |                    | 1,134              |                    |

Note: Ref=Reference group, UCoef=Unadjusted Coefficient, ACoef= Adjusted Coefficient, URR=Unadjusted Relative Risk of No problems, ARR=Adjusted Relative Risk of No problems, CI=95% Confidence Interval, ED=Emergency Department, ISS=Injury Severity Score. ^ = Reference group for each injury group is absence of the injury group. ~ This measure was considered important as showed a positive 95% CI. Intraclass correlation (ICC) was 0.60. Significant figures in Bold.

**Supplementary Table S4.** EQ-5D Utility Score and Five Health States Model Results Including Age x Sex Interaction

|                                    | EQ-5D<br>Utility Score<br>ACoef.<br>(CI) | Mobility<br>ARR<br>(CI)            | Self-Care<br>ARR<br>(CI)           | Activity<br>ARR<br>(CI)            | Pain<br>ARR<br>(CI)                | Anxiety & De-<br>pression<br>ARR<br>(CI) |
|------------------------------------|------------------------------------------|------------------------------------|------------------------------------|------------------------------------|------------------------------------|------------------------------------------|
| <b>Sex</b>                         |                                          |                                    |                                    |                                    |                                    |                                          |
| Male                               | Ref                                      |                                    |                                    |                                    |                                    |                                          |
| Female                             | -0.01<br>(-0.03, 0.01)                   | 0.96<br>(0.91, 1.02)               | 0.96<br>(0.90, 1.02)               | 0.96<br>(0.85, 1.08)               | 0.91<br>(0.80, 1.03)               | 0.99<br>(0.91, 1.08)                     |
| <b>Age Group</b>                   |                                          |                                    |                                    |                                    |                                    |                                          |
| 5-9 years                          | Ref                                      |                                    |                                    |                                    |                                    |                                          |
| 10-14 years                        | -0.03<br>(-0.05, -0.01)                  | 0.97<br>(0.93, 1.02)               | 0.96<br>(0.91, 1.02)               | 0.92<br>(0.83, 1.02)               | 0.94<br>(0.84, 1.04)               | 0.96<br>(0.88, 1.05)                     |
| 15-17 years                        | -0.05<br>(-0.07, -0.03)                  | 0.96<br>(0.87, 1.06)               | 0.96<br>(0.89, 1.03)               | 0.87<br>(0.75, 1.01)               | 0.87<br>(0.73, 1.03)               | 1.06<br>(0.97, 1.16)                     |
| <b>Sex x Age Group Interaction</b> |                                          |                                    |                                    |                                    |                                    |                                          |
| Female x 5-9 years                 | Ref                                      |                                    |                                    |                                    |                                    |                                          |
| Female x 10-14 years               | 0.00<br>(-0.03, 0.03)                    | 1.01<br>(0.92, 1.11)               | 1.05<br>(0.97, 1.15)               | 1.04<br>(0.89, 1.22)               | 1.07<br>(0.89, 1.28)               | 1.06<br>(0.96, 1.18)                     |
| Female x 15-17 years               | <b>-0.05</b><br><b>(-0.08, -0.02)</b>    | 0.98<br>(0.90, 1.07)               | 1.04<br>(0.97, 1.13)               | 0.87<br>(0.74, 1.01)               | 0.85<br>(0.72, 1.01)               | <b>0.82</b><br><b>(0.73, 0.93)</b>       |
| <b>Socio Economic Status (SES)</b> |                                          |                                    |                                    |                                    |                                    |                                          |
| Low SES                            | Ref                                      |                                    |                                    |                                    |                                    |                                          |
| Moderate SES                       | 0.01<br>(0.00, 0.03)                     | 1.01<br>(0.97, 1.05)               | 1.01<br>(0.99, 1.04)               | <b>1.07</b><br><b>(1.01, 1.14)</b> | 1.06<br>(0.99, 1.13)               | 1.00<br>(0.95, 1.05)                     |
| High SES                           | <b>0.03</b><br><b>(0.01, 0.04)</b>       | 1.03<br>(0.99, 1.08)               | 1.00<br>(0.97, 1.04)               | 1.04<br>(0.97, 1.11)               | <b>1.12</b><br><b>(1.05, 1.20)</b> | 1.03<br>(0.98, 1.08)                     |
| <b>Transport Status</b>            |                                          |                                    |                                    |                                    |                                    |                                          |
| Non-transport                      | Ref                                      |                                    |                                    |                                    |                                    |                                          |
| Transport                          | <b>-0.02</b><br><b>(-0.04, -0.01)</b>    | <b>0.92</b><br><b>(0.88, 0.97)</b> | 0.97<br>(0.94, 1.00)               | <b>0.91</b><br><b>(0.84, 0.98)</b> | <b>0.91</b><br><b>(0.84, 0.98)</b> | 0.95<br>(0.89, 1.01)                     |
| <b>Hospital Status</b>             |                                          |                                    |                                    |                                    |                                    |                                          |
| ED presentation only               | Ref                                      |                                    |                                    |                                    |                                    |                                          |
| Hospital admission                 | 0.00<br>(-0.02, 0.02)                    | 0.94<br>(0.88, 1.00)               | <b>0.88</b><br><b>(0.83, 0.93)</b> | <b>0.77</b><br><b>(0.69, 0.87)</b> | <b>0.88</b><br><b>(0.79, 0.98)</b> | 0.95<br>(0.89, 1.01)                     |
| <b>Comorbidity Status</b>          |                                          |                                    |                                    |                                    |                                    |                                          |
| No comorbidities                   | Ref                                      |                                    |                                    |                                    |                                    |                                          |
| At least 1 comorbidity             | <b>-0.04</b><br><b>(-0.06, -0.01)</b>    | 0.99<br>(0.90, 1.08)               | 1.01<br>(0.95, 1.07)               | 0.94<br>(0.83, 1.06)               | 0.99<br>(0.88, 1.12)               | 0.99<br>(0.89, 1.11)                     |
| <b>ISS Tertiles</b>                |                                          |                                    |                                    |                                    |                                    |                                          |
| Low (<5)                           | Ref                                      |                                    |                                    |                                    |                                    |                                          |
| Mid (5-15)                         | -0.02<br>(-0.04, 0.00)                   | 0.99<br>(0.93, 1.07)               | 1.00<br>(0.96, 1.04)               | 0.98<br>(0.88, 1.09)               | 1.04<br>(0.94, 1.15)               | 0.97<br>(0.89, 1.05)                     |
| High (16+)                         | <b>-0.01</b><br><b>(-0.03, 0.02)</b>     | 0.95<br>(0.87, 1.05)               | 0.98<br>(0.92, 1.04)               | 1.04<br>(0.89, 1.21)               | 1.11<br>(0.96, 1.28)               | 0.96<br>(0.84, 1.09)                     |
| <b>Intent</b>                      |                                          |                                    |                                    |                                    |                                    |                                          |
| Unintentional                      | Ref                                      |                                    |                                    |                                    |                                    |                                          |
| Intentional                        | <b>-0.08</b><br><b>(-0.11, -0.04)</b>    | 0.94<br>(0.86, 1.03)               | 0.99<br>(0.92, 1.06)               | 0.85<br>(0.71, 1.02)               | <b>0.85</b><br><b>(0.73, 0.98)</b> | <b>0.62</b><br><b>(0.49, 0.78)</b>       |
| Intent not known                   | 0.02<br>(-0.01, 0.04)                    | 1.00<br>(0.94, 1.07)               | 0.99<br>(0.96, 1.03)               | 1.02<br>(0.92, 1.12)               | 1.00<br>(0.91, 1.10)               | 1.04<br>(0.96, 1.12)                     |
| <b>Time</b>                        |                                          |                                    |                                    |                                    |                                    |                                          |
| 1-month                            | Ref                                      |                                    |                                    |                                    |                                    |                                          |
| 3,4-months                         | <b>0.12</b>                              |                                    |                                    |                                    |                                    |                                          |

|                                                              |                |               |               |               |               |               |
|--------------------------------------------------------------|----------------|---------------|---------------|---------------|---------------|---------------|
|                                                              | ( 0.09, 0.14)  |               |               |               |               |               |
| 6-months                                                     | 0.11           | 1.17          | 1.31          | 1.64          | 1.40          | 1.13          |
|                                                              | ( 0.08, 0.13)  | ( 1.11, 1.23) | ( 1.22, 1.40) | ( 1.48, 1.82) | ( 1.28, 1.53) | ( 1.08, 1.19) |
| 12-months                                                    | 0.13           | 1.18          | 1.31          | 1.78          | 1.47          | 1.16          |
|                                                              | ( 0.10, 0.15)  | ( 1.11, 1.24) | ( 1.22, 1.40) | ( 1.60, 1.98) | ( 1.34, 1.61) | ( 1.10, 1.22) |
| 24-months                                                    | 0.13           | 1.21          | 1.33          | 1.85          | 1.48          | 1.09          |
|                                                              | ( 0.11, 0.15)  | ( 1.14, 1.29) | ( 1.24, 1.43) | ( 1.64, 2.07) | ( 1.33, 1.64) | ( 1.02, 1.17) |
| <b>Injury Type (any)^</b>                                    |                |               |               |               |               |               |
| N33, N34 Spinal cord lesion                                  | -0.11          | 0.61          | 0.76          | 0.64          | 0.98          | 1.02          |
|                                                              | (-0.18, -0.04) | ( 0.45, 0.83) | ( 0.63, 0.91) | ( 0.47, 0.87) | ( 0.76, 1.26) | ( 0.87, 1.19) |
| N19, N26 Fracture of femur                                   | -0.07          | 0.71          | 0.85          | 0.71          | 0.79          | 0.95          |
|                                                              | (-0.10, -0.04) | ( 0.62, 0.82) | ( 0.78, 0.92) | ( 0.60, 0.84) | ( 0.67, 0.94) | ( 0.84, 1.07) |
| N20 Fracture of patella, tibia, fibula, or ankle             | -0.06          | 0.77          | 0.93          | 0.76          | 0.78          | 0.93          |
|                                                              | (-0.08, -0.04) | ( 0.72, 0.83) | ( 0.89, 0.96) | ( 0.70, 0.84) | ( 0.71, 0.86) | ( 0.87, 1.00) |
| N28 Moderate to severe traumatic brain injury                | -0.02          | 0.95          | 0.94          | 0.83          | 0.96          | 0.89          |
|                                                              | (-0.04, 0.00)  | ( 0.87, 1.03) | ( 0.88, 1.01) | ( 0.71, 0.96) | ( 0.85, 1.10) | ( 0.79, 1.01) |
| N37, N17, N18 Crush injury, fracture foot/hand bones         | -0.01          | 0.93          | 0.95          | 0.93          | 0.91          | 0.99          |
|                                                              | (-0.03, 0.02)  | ( 0.87, 1.01) | ( 0.91, 1.00) | ( 0.84, 1.03) | ( 0.81, 1.02) | ( 0.92, 1.06) |
| N43 Internal hemorrhage in abdomen or pelvis                 | 0.01           | 0.98          | 1.01          | 1.04          | 1.04          | 0.99          |
|                                                              | (-0.02, 0.03)  | ( 0.90, 1.06) | ( 0.96, 1.06) | ( 0.92, 1.17) | ( 0.92, 1.16) | ( 0.89, 1.10) |
| N27 Minor TBI                                                | 0.00           | 1.05          | 1.05          | 1.04          | 1.00          | 1.07          |
|                                                              | (-0.01, 0.02)  | ( 0.99, 1.12) | ( 1.00, 1.09) | ( 0.94, 1.15) | ( 0.91, 1.10) | ( 0.99, 1.16) |
| N21 Fracture of pelvis                                       | -0.05          | 0.84          | 0.96          | 0.80          | 0.79          | 0.85          |
|                                                              | (-0.08, -0.02) | ( 0.74, 0.95) | ( 0.90, 1.03) | ( 0.67, 0.96) | ( 0.66, 0.95) | ( 0.73, 0.99) |
| N42 Severe chest Injury                                      | 0.01           | 1.03          | 1.02          | 1.01          | 1.03          | 1.02          |
|                                                              | (-0.01, 0.03)  | ( 0.96, 1.10) | ( 0.97, 1.07) | ( 0.90, 1.14) | ( 0.93, 1.15) | ( 0.92, 1.13) |
| N8, N9, N10 Burns (including lower airways)                  | -0.06          | 0.96          | 0.93          | 0.84          | 1.04          | 0.82          |
|                                                              | (-0.13, 0.01)  | ( 0.85, 1.09) | ( 0.84, 1.03) | ( 0.63, 1.11) | ( 0.86, 1.25) | ( 0.63, 1.08) |
| N25 Fracture of vertebral column                             | -0.05          | 0.95          | 0.93          | 0.79          | 0.74          | 0.90          |
|                                                              | (-0.07, -0.03) | ( 0.90, 1.02) | ( 0.89, 0.97) | ( 0.71, 0.89) | ( 0.65, 0.84) | ( 0.83, 0.99) |
| N35, N36 Asphyxiation, Non-fatal submersion                  | -0.11          | 0.84          | 0.78          | 0.98          | 1.27          | 0.37          |
|                                                              | (-0.20, -0.03) | ( 0.57, 1.23) | ( 0.47, 1.28) | ( 0.51, 1.88) | ( 0.99, 1.63) | ( 0.14, 0.95) |
| N40, N44 Contusion, open wound                               | -0.02          | 0.95          | 0.97          | 0.92          | 0.96          | 0.89          |
|                                                              | (-0.03, -0.00) | ( 0.91, 0.99) | ( 0.94, 1.00) | ( 0.85, 1.00) | ( 0.89, 1.03) | ( 0.83, 0.95) |
| N14 Other injuries of muscle & tendon and other dislocations | -0.02          | 0.95          | 0.97          | 0.91          | 0.94          | 0.97          |
|                                                              | (-0.04, 0.00)  | ( 0.90, 1.00) | ( 0.94, 1.01) | ( 0.84, 0.99) | ( 0.87, 1.01) | ( 0.92, 1.03) |
| N15 Fracture of clavicle, scapula, or humerus                | -0.02          | 0.99          | 0.97          | 0.89          | 0.91          | 0.95          |
|                                                              | (-0.04, 0.00)  | ( 0.94, 1.04) | ( 0.92, 1.01) | ( 0.81, 0.98) | ( 0.83, 1.00) | ( 0.88, 1.03) |
| N22 Fracture of radius or ulna                               | -0.00          | 0.98          | 0.94          | 0.91          | 0.97          | 1.00          |
|                                                              | (-0.02, 0.02)  | ( 0.94, 1.02) | ( 0.90, 0.97) | ( 0.84, 0.99) | ( 0.89, 1.05) | ( 0.94, 1.06) |
| Other                                                        | -0.01          | 0.99          | 0.99          | 0.98          | 0.93          | 0.93          |
|                                                              | (-0.03, -0.00) | ( 0.95, 1.04) | ( 0.96, 1.03) | ( 0.91, 1.05) | ( 0.87, 1.00) | ( 0.87, 0.98) |

|                        |       |       |       |       |       |       |
|------------------------|-------|-------|-------|-------|-------|-------|
| Number of observations | 5,341 | 2,776 | 2,759 | 2,747 | 2,723 | 2,776 |
| Number of groups       | 2,135 | 1,131 | 1,133 | 1,131 | 1,134 | 1,134 |

Note: Ref=Reference group, ACoef= Adjusted Coefficient, ARR=Adjusted Relative Risk of No problems, CI=95% Confidence Interval, ED=Emergency Department, ISS=Injury Severity Score. ^ = Reference group for each injury group is absence of the injury group. Significant figures in Bold. Significant interaction shaded gray.
